# Supplementary material for: Modeling Contact Inhibition of Locomotion of Colliding Cells Migrating on Micropatterned Substrates
Source: PLOS journal article supplement (doi:10.1371/journal.pcbi.1005239), 2016-12-16
Supplement: S16 (10.1371/journal.pcbi.1005239.s016) [file journal.pcbi.1005239.s016]

|              |                                                                                                                                                                                                                                                                                                               |
|--------------|---------------------------------------------------------------------------------------------------------------------------------------------------------------------------------------------------------------------------------------------------------------------------------------------------------------|
| not included | Table 1: <b>Definitions of the different cases</b><br>a cell turns around due to internal noise (distance between the cells is greater than $3 \times r_{cell}$ when a cell turns)                                                                                                                            |
| rotation     | cells turn around <b>and</b> pass each other more than two times                                                                                                                                                                                                                                              |
| sticking     | y-velocity of both cells is below $0.005\mu m/s$<br><b>or</b> the distance between the cells is smaller than $20m$ for the second half of the simulation and both cells turn around<br><b>or</b> the distance between the cells is smaller than $35m$ and the y-velocity of both cells is below $0.02\mu m/s$ |
| walk-past    | no cell turns around <b>or</b> both cells turn around and pass each other two times over the course of the simulation (“double walk-past”)<br><b>and</b> the distance between the cells is greater than $3 \times r_{cell}$ when the simulation ends.                                                         |
| reversal     | both cells turn around <b>and</b> the distance between the cells is greater than $3 \times r_{cell}$ when the simulation ends <b>and</b> the cells have never passed each other.                                                                                                                              |
| chain        | only one cell turns around <b>and</b> the distance between the cells is less than $3 \times r_{cell}$ when the simulation ends <b>and</b> the cells have never passed each other.                                                                                                                             |

A turn around is detected if the y-velocity of a cell changes its sign. For the latter three cases we only compare the sign of the start and the end velocity to detect a turn around. To compute the rates for each case we divide the count for a specific outcome by the total number of simulation, excluding the first entry of the table (“not included”).
